# Supplementary material
Source: publisher figshare collection journal article supplement (https://acs.figshare.com/ndownloader/files/17421986)
Supplement: Supplementary file 1 [file 17421986]

Compound,SMILE,ARGI I IC50,ARGI II IC50
1,C=CCOC(CCCCC(OCC=C)=O)=O,,
2,O=C(CCC1)C1C(OCC=C)=O,,
3,O=C(CCC1)C1CC=C,,
4,C=CC[C@@H]1[C@@](C(NC(C)(C)C)=O)(NC(C)=O)CCC1,,
5,C=CC[C@@H]1[C@](C(NC(C)(C)C)=O)(NC(C)=O)CCC1,,
6,CC(C(C)(C)O1)(C)OB1CCC[C@@H]2[C@@](C(NC(C)(C)C)=O)(NC(C)=O)CCC2,,
7,N[C@](CCC1)(C(O)=O)[C@H]1CCCB(O)O,380 nM,"1,280 nM"
8,CC(C(C)(C)O1)(C)OB1CCC[C@@H]2[C@](C(NC(C)(C)C)=O)(NC(C)=O)CCC2,,
9,N[C@@](CCC1)(C(O)=O)[C@H]1CCCB(O)O,48.0 mM,79.2 mM
10,C=CC[C@@H]1[C@](N(C(C)=O)[C@@H](C)C2=CC=CC=C2)(C(NC(C)(C)C)=O)CCC1,,
11,C=CC[C@H]1[C@@](N(C(C)=O)[C@@H](C)C2=CC=CC=C2)(C(NC(C)(C)C)=O)CCC1,,
12,C[C@@H](C1=CC=CC=C1)N(C(C)=O)[C@](CCC2)(C(NC(C)(C)C)=O)[C@H]2CCCB3OC(C)(C)C(C)(C)O3,,
13,N[C@](CCC1)(C(O)=O)[C@H]1CCCB(O)O,210 nM,630 nM
14,C[C@@H](C1=CC=CC=C1)N(C(C)=O)[C@@](CCC2)(C(ONC(C)(C)C)=O)[C@@H]2CCCB3OC(C)(C)C(C)(C)O3,,
15,N[C@@](CCC1)(C(O)=O)[C@@H]1CCCB(O)O,,
16,CC(OC(N1CC2C(O2)C1)=O)(C)C,,
17,C=CC[C@@H]1[C@@H](O)CN(C(OC(C)(C)C)=O)C1,,
18,C=CCC1C(CN(C(OC(C)(C)C)=O)C1)=O,,
19,C=CC[C@@H]1[C@](NC(C)=O)(C(NC(C)(C)C)=O)CN(C(OC(C)(C)C)=O)C1,,
20,C=CC[C@@H]1[C@@](C(NC(C)(C)C)=O)(NC(C)=O)CNC1,,
21,C=CC[C@@H]1[C@@](C(NC(C)(C)C)=O)(NC(C)=O)CN(C(OC(C)(C)C)=O)C1,,
22,CC(C(C)(C)O1)(C)OB1CCC[C@@H]2[C@@](C(NC(C)(C)C)=O)(NC(C)=O)CN(C(OC(C)(C)C)=O)C2,,
23,N[C@](CNC1)(C(O)=O)[C@H]1CCCB(O)O,110 nM,440 nM
24,CC(C(C)(C)O1)(C)OB1CCC[C@@H]2[C@@](C(NC(C)(C)C)=O)(NC(C)=O)CNC2,,
25,[Bpin]CCC[C@@H]1[C@@](C(NC(C)(C)C)=O)(NC(C)=O)CN(CC2=CN=CC=C2)C1,,
26,N[C@](CN(CC1=CN=CC=C1)C2)(C(O)=O)[C@H]2CCCB(O)O,,
27,O=S1(OC[C@@H](C)N1C(OC(C)(C)C)=O)=O,,
28,CC(C(C)(C)O1)(C)OB1CCC[C@@H]2[C@@](C(NC(C)(C)C)=O)(NC(C)=O)CN(C[C@@H](C)NC(OC(C)(C)C)=O)C2,,
29,N[C@](CN(C[C@@H](C)N)C1)(C(O)=O)[C@H]1CCCB(O)O,16 nM,37 nM
30,N[C@]1(C(O)=O)[C@@H](CCCB(O)O)CN(CC(C)C)C1,390 nM,"1,610 nM"
31,N[C@]1(C(O)=O)[C@@H](CCCB(O)O)CN(CC2=CC=CC=C2)C1,300 nM,"1,540 nM"
32,N[C@]1(C(O)=O)[C@@H](CCCB(O)O)CN(CC2=CC=NC=C2)C1,600 nM,"1,860 nM"
33,N[C@]1(C(O)=O)[C@@H](CCCB(O)O)CN(CC2=CC=CC=N2)C1,380 nM,"1,270 nM"
34,N[C@]1(C(O)=O)[C@@H](CCCB(O)O)CN(CC2=C(F)C=CC=N2)C1,670 nM,"2,160 nM"
35,N[C@]1(C(O)=O)[C@@H](CCCB(O)O)CN(CC2=CNN=C2C)C1,400 nM,"2,180 nM"
36,N[C@]1(C(O)=O)[C@@H](CCCB(O)O)CN(CC2=C(C)N(C)N=C2C)C1,340 nM,"2,230 nM"
37,N[C@]1(C(O)=O)[C@@H](CCCB(O)O)CN(CC2=NC=CN2C)C1,100 nM,330 nM
38,N[C@@]1([C@@H](CCCB(O)O)CN(CC2=CN=CS2)C1)C(O)=O,360 nM,850 nM
39,N[C@@]1([C@@H](CCCB(O)O)CN(C[C@H](C)N)C1)C(O)=O,7.7 nM,16 nM
40,N[C@@]1([C@@H](CCCB(O)O)CN(C[C@@H](C2=CC=CC=C2)N)C1)C(O)=O,18 nM,62 nM
41,N[C@@]1([C@@H](CCCB(O)O)CN(C[C@H](C2=CC=CC=C2)N)C1)C(O)=O,2.5 nM,9.5 nM
42,N[C@@]1([C@@H](CCCB(O)O)CN(C[C@@H](CC2=CC=CC=C2)N)C1)C(O)=O,10 nM,27 nM
43,N[C@@]1([C@@H](CCCB(O)O)CN(C[C@H](CC2=CC=CC=C2)N)C1)C(O)=O,1.3 nM,8.1 nM
44,N[C@@]1([C@@H](CCCB(O)O)CN(C[C@H]2NCCOC2)C1)C(O)=O,10 nM,27 nM
45,N[C@@]1([C@@H](CCCB(O)O)CN(C[C@@H]2NCCOC2)C1)C(O)=O,19 nM,65 nM
46,N[C@]1(C(O)=O)[C@@H](CCCB(O)O)CN(C[C@@H]2CCCN2)C1,11 nM,47 nM
47,N[C@]1(C(O)=O)[C@@H](CCCB(O)O)CN(C[C@H]2CCCN2)C1,10 nM,37 nM
48,N[C@]1(C(O)=O)[C@@H](CCCB(O)O)CN(C[C@H]2CCCCN2)C1,30 nM,95 nM
49,N[C@]1(C(O)=O)[C@@H](CCCB(O)O)CN(C[C@@H]2CCCCN2)C1,2.6 nM,14 nM
